# Supplementary material for: Dandelion-like core–shell silica microspheres with hierarchical pores
Source: Royal Society of Chemistry journal article supplement (doi:10.1039/c4ra16890a), 2015-01-01
Supplement: c4ra16890a1.pdf [file c4ra16890a1.pdf]

## Supporting Information

### **Dandelion-like Core-shell Silica Microspheres with Hierarchical Pores**

Yi Min,<sup>a,b</sup> Kaiguang Yang,<sup>a</sup> Zhen Liang,<sup>a</sup> Lihua Zhang <sup>\*a</sup> and Yukui Zhang<sup>a</sup>

<sup>a</sup> National Chromatographic R. & A. Center, Key Laboratory of Separation Science for Analytical Chemistry, Dalian Institute of Chemical Physics, Chinese Academy of Sciences, Dalian 116023, China.

<sup>b</sup> Graduate School of Chinese Academy of Sciences, Beijing 100039, China

\* To whom correspondence should be addressed:

Prof. Lihua Zhang

Tel: +86-411-84379720

Fax: +86-411-84379560

E-mail: lihuazhang@dicp.ac.cn

## Materials

Tetraethyl orthosilicate (98%, TEOS), hexadecyltrimethylammonium chloride ( $\geq 98.0\%$ , CTAC), ammonium fluoride ( $\geq 98.0\%$ ), cetylpyridinium chloride ( $\geq 98.0\%$ , CPC), *N,N*-dimethylhexadecylamine ( $\geq 95\%$ , DMHA) and ammonium hydroxide solution (28.0-30.0%) were obtained from Sigma-Aldrich (St. Louis, MO, USA). *N,N*-dimethyldecylamine (93.0%, DMDA) was purchased from J&K Scientific Ltd. (Beijing, China). Deionized water was used throughout the experiments (Millipore, Billerica, MA, USA).

## Instrumentation

The particles were centrifuged with a Heraeus Multifuge 1S-R centrifuge (Thermo Fisher Scientific, Waltham, MA, USA). The calcination was carried out with a Ceramic Fibre Muffle Furnace (Michem, Beijing, China), with the maximum temperature as 1200 °C. The morphology and microstructure of the as-prepared particles were investigated by means of field emission scanning electron microscopy (5.0 kV, JSM-7800F, Peabody, MA, USA), scanning electron microscopy after sputtering gold layers for 120 s (20 kV SEM, FEI, Eindhoven, Holland), transmission electron microscopy (120kV, JEM-2000EX, Peabody, MA, USA), and nitrogen adsorption-desorption analysis (ASAP 2020, Micromeritics, Norcross, GA, USA). For nitrogen sorption experiments, samples (typically 150 mg dry powder) were outgassed at 350 °C for 10 h under vacuum to remove the adsorbent from the surface, and then nitrogen adsorption-desorption isotherms were obtained through physisorption measurements (nitrogen volume against its relative pressure). Finally, surface area was determined from the isotherms by Brunauer-Emmett-Teller (BET) method. The nanopore diameter was obtained from Barrett-Joyner-Halenda (BJH) method.

## Particle preparation

In our experiments, nonporous silica (NPS) particles were prepared according to our previous protocol,<sup>1</sup> and 1 g of the NPS particles were added into the microemulsion system consisted of 100 ml of water, varied amounts (4.5, 2.3 and 0.8 g corresponding to 5.8, 3, 1 mL) of DMDA and 1.0 g of CTAC. Then, 26 mg of ammonium fluoride and 6.0 ml

of ammonia were sequentially added into the solution. The reaction was carried out at 90 °C for 24 h under magnetic stirring. The product was washed with 95% (v/v) ethanol (3 times) and water (2 times) by centrifugation at 2500 rpm in 3 min, dried at 65 °C, and calcined from 25 to 550 °C at a ramp rate of 1 °C min<sup>-1</sup> with the final temperature kept at 550 °C for 6 h in air.

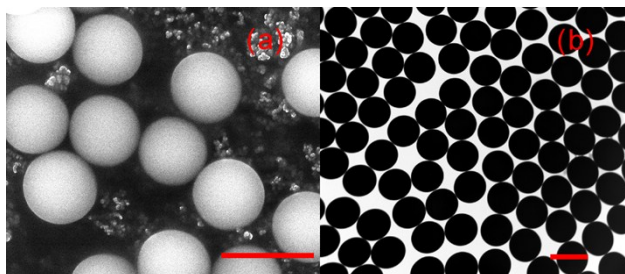

**Fig. S1** Electron microscopic images of NPS silica particles.  
SEM: (a); TEM: (b). The scale bar is 2  $\mu\text{m}$ .

#### **Preparation of particles from DMHA and CTAC**

The dual-template was DMHA and CTAC, and other condition was same as mentioned above (mass ratio of DMHA/CTAC was 4.6).

#### **Preparation of particles from DMDA and CPC**

The dual-template was DMDA and CPC, and other condition was same as mentioned above (mass ratio of DMDA/CPC was 4.5).

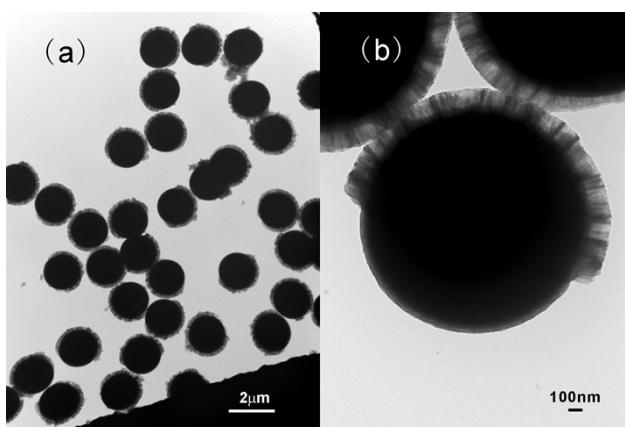

**Fig. S2** TEM images of particles prepared by dual-template of DMDA and CPC.

## Reference

- 1 Y. Min, B. Jiang, C. Wu, S. Xia, X. Zhang, Z. Liang, L. Zhang, Y. Zhang, *J. Chromatogr. A*, 2014, **1356**, 148-156.
